# Supplementary material for: Antibody responses to avian influenza viruses in wild birds broaden with age
Source: PubMed Central journal article supplement (PMC5204166; doi:10.1098/rspb.2016.2159), 2016-12-28
Supplement: rspb20162159supp3.pdf [file rspb20162159supp3.pdf]

a)

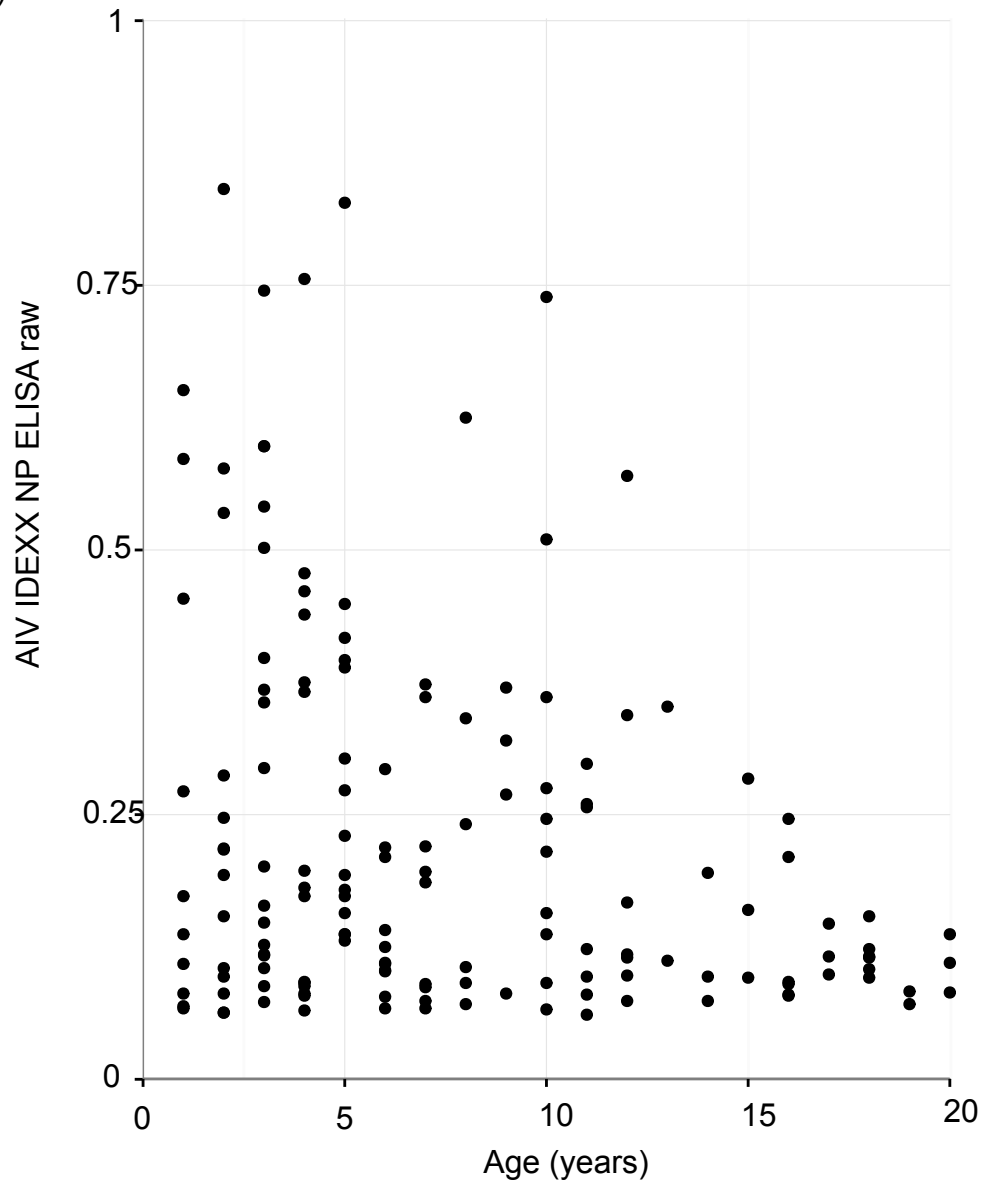

Supplementary Figure 3a: Raw score of NP-ELISA decreases with increasing age.

b)

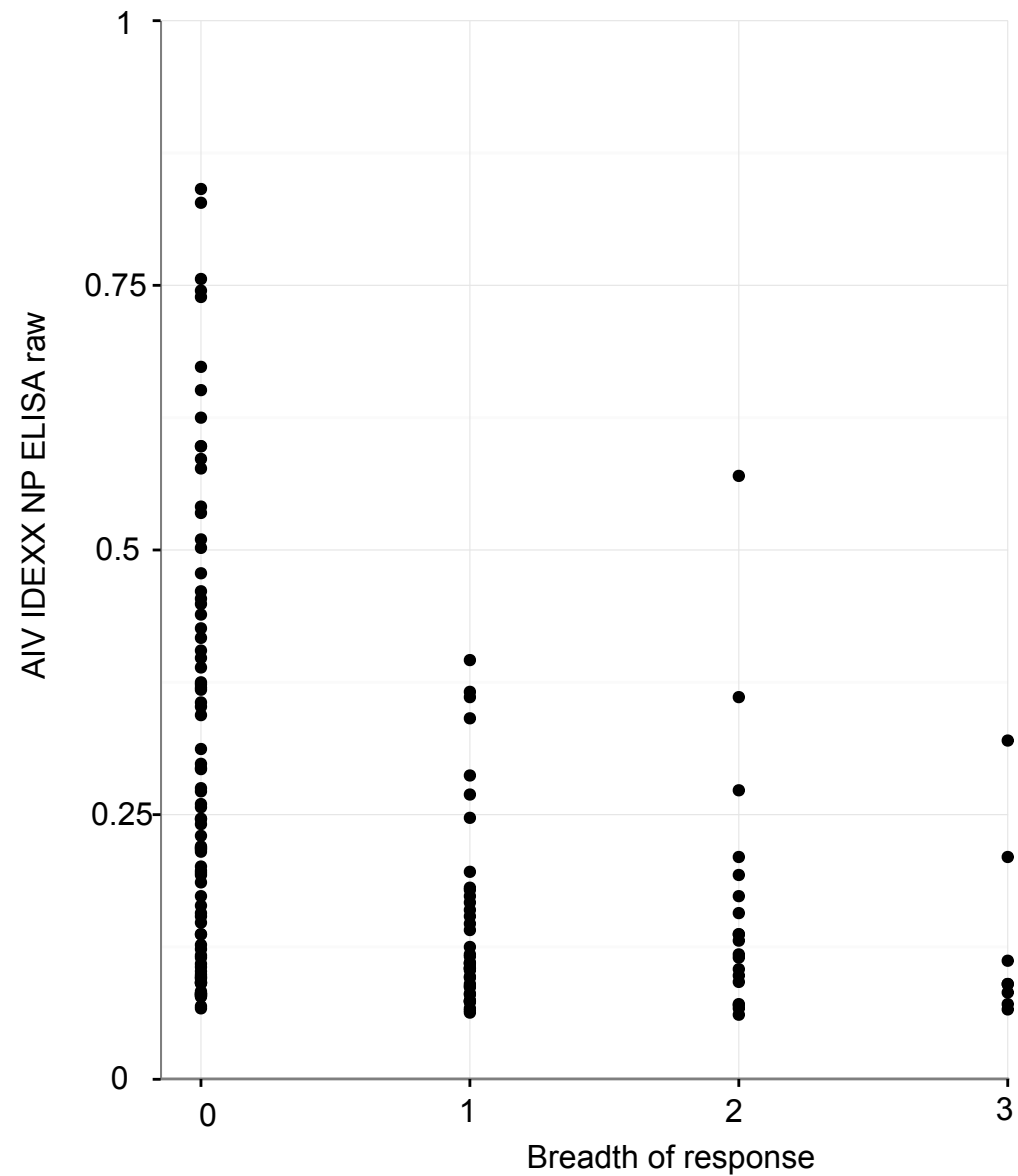

Supplementary Figure 3b: Raw score of NP-ELISA decreases with increasing breadth of response. Breadth of response calculated as dataset A.
